# Supplementary material for: Abundance of Opisthorchis felineus Metacercariae in cyprinid fish in the middle Ob River basin (Tomsk region, Russia)
Source: PubMed Central journal article supplement — Food Waterborne Parasitol. 2021 Feb 5;22:e00113. doi: 10.1016/j.fawpar.2021.e00113 (PMC7930129; doi:10.1016/j.fawpar.2021.e00113), 2021-02-05
Supplement: mmc2.pdf [file mmc2.pdf]

ГОСУДАРСТВЕННОЕ БЮДЖЕТНОЕ ОБРАЗОВАТЕЛЬНОЕ УЧРЕЖДЕНИЕ  
ВЫСШЕГО ПРОФЕССИОНАЛЬНОГО ОБРАЗОВАНИЯ  
«СИБИРСКИЙ ГОСУДАРСТВЕННЫЙ МЕДИЦИНСКИЙ УНИВЕРСИТЕТ»  
МИНИСТЕРСТВА ЗДРАВООХРАНЕНИЯ  
РОССИЙСКОЙ ФЕДЕРАЦИИ  
(ГБОУ ВПО СибГМУ Минздрава России)

Этический комитет

634050, г. Томск, Московский тракт, 2г, ст 18 телефон № 52-96-19

*Этический комитет ГБОУ ВПО СибГМУ Минздрава России действует в соответствии с нормами ICH GCP.*

## ЗАКЛЮЧЕНИЕ

**Регистрационный №: 4815**

**Дата регистрации:** 20 июня 2016г.

**Дата проведения заседания:** 27 июня 2016г.

**Название исследования:** «Эпидемиологическое исследование распространенности инвазии *Ophiorhynchis felinus* в Томской области».

**Место проведения:** ГБОУ ВПО «Сибирский государственный медицинский университет» Министерства здравоохранения Российской Федерации, 634050 г. Томск, Московский тракт, 2

**Главный исследователь:** Федорова О.С.

**Рецензент:** д.м.н. проф. Карзилов А.И.

**Присутствовали:** Жукова Н.Г., Алябьев Ф.В., Комкова Т.Б., Терентьева А.А., Карзилов А.И., Лукашова Л.В., Ваизова О.Е., Самойлова Ю.Г., Тимошенко Г.И., Лаптева Е.В., Фимушкина Н.Ю.

**Были рассмотрены следующие документы данного исследования:**

1. Протокол НИР
2. Справка о выполненном объеме НИР
3. Информационный лист для взрослых и детей старше 14 лет
4. Информированное согласие для взрослых и детей старше 14 лет
5. Информационный лист для родителей/опекунов детей 3-13 лет
6. Информированное согласие для родителей/опекунов детей 3-13 лет
7. Индивидуальная регистрационная карта
8. Клинический вопросник

**Решение:** Одобрить проведение клинического исследования по протоколу «Эпидемиологическое исследование распространенности инвазии *Opisthorchis felinus* в Томской области».

Документация представлена полностью и не противоречит требованиям Этической экспертизы.

Зам.председателя  
д.м.н., профессор:

Секретарь:

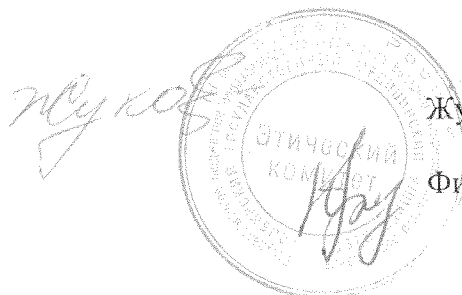

Жукова Н.Г.

Фимушкина Н.Ю.
