# Supplementary material for: Abundance of Opisthorchis felineus Metacercariae in cyprinid fish in the middle Ob River basin (Tomsk region, Russia)
Source: PubMed Central journal article supplement — Food Waterborne Parasitol. 2021 Feb 5;22:e00113. doi: 10.1016/j.fawpar.2021.e00113 (PMC7930129; doi:10.1016/j.fawpar.2021.e00113), 2021-02-05
Supplement: mmc3.pdf [file mmc3.pdf]

# HOUSEHOLD QUESTIONNAIRE

## GENERAL HOUSEHOLD INFORMATION

Date of interview

Address

Number of household members

Members of household:

Person, who filled in the questionnaire:

|             |               |        |    |
|-------------|---------------|--------|----|
| 1/ Initials | Date of birth | Gender | ID |
|-------------|---------------|--------|----|

Other members:

|             |               |        |    |
|-------------|---------------|--------|----|
| 2/ Initials | Date of birth | Gender | ID |
|-------------|---------------|--------|----|

|             |               |        |    |
|-------------|---------------|--------|----|
| 3/ Initials | Date of birth | Gender | ID |
|-------------|---------------|--------|----|

etc

---

## HOUSING CHARACTERISTICS

**1. Where do you live now?**

Farm

Village

Small town

Suburb of a city

City

**2. Do you live in:**

apartment house

private house

**3. Do you:**

rent this house/apartment

have this house/apartment as property

**4. Describe the materials of the walls of the house:**

Brick

Wooding

Panel

other

**5. Describe the materials of the roof of the house:**

Metal

Polymer

Slate

other

**6. Year of construction of the house**

**7. Is there any dampness, mold growth in your flat / house?**

**8. How many rooms are in the house?**

**9. How many people live in the house?**

**WATER SUPPLY**

**10. What is the water supply in the house?**

tap water

well-water

private well-pump

no water supply

other

**11. What is your main source of drinking water?**

tap water

well-water

private well-pump

river / lake water

rainwater

melt water

**12. Do you boil the water before drinking?**

**13. Do you use the individual purification filter for water?**

**14. What is your main source of water for washing dishes?**

tap water

well-water

private well-pump

river / lake water

rainwater

melt water

**15. What is your main source of water for washing fruits and vegetables**

tap water

well-water

private well-pump

river / lake water

rainwater

melt water

**LATRINE**

**16. Where is the toilet of your house?**

Outside the house  
Inside the house

**17. Is there the septic tank in the house?**

**18. What type of toilet do you use in the house?**

Sink-hole without a septic isolation  
Sink-hole with a septic isolation

**CAR**

**19. Does your family have a car?**

(yes/no)

*If yes:*

**20. What is the year of construction of your car?**

**PETS AND INSECTS**

**21. Does anyone in your house keep any of the following pets?**

|                 |       |    |
|-----------------|-------|----|
| Cats            | yes   | no |
| dogs            | yes   | no |
| cows            | yes   | no |
| pigs            | yes   | no |
| goats           | yes   | no |
| horses          | yes   | no |
| poultry         | yes   | no |
| other (specify) | _____ |    |

**22. Are there any rodents (mices, rats) in your house?**

**23. Are there any insects (cockroaches, bugs, ants) in your house?**

**FISH STORY**

**24. Does anyone in your house consume river fish?**

(yes/no)

*If yes:*

**25. Where do your family get the river fish:**

**25.1 Take fish from other people: relatives/friends/neighbors** (yes/no)

**25.2 Buy in shops** (yes/no)

**25.3 Are there any fisherman in your house?** (yes/no)

*If 25.3 yes:*

**26. Where somebody of the households regularly fishing?**

River  
ponds

**27. How frequent somebody of the households regularly fishing?**

Every day  
most days of the week  
2-3 times a week  
2-3 times a month  
less than 1 time a month

**28. What are you doing with the fish?**

Consume  
Sell

**29. How long do you cook / boil the fish (in min.)**

**30. What are the main dishes you do with fish? Please list:**

---

---

---

**31. Do you use special utensil for processing of river fish (Knives, cutting boards)?**

**32. Do you feed your pets (cats, dogs etc) by river fish or its intestines?**

**THANK YOU FOR COMPLETING THE QUESTIONNAIRE!**
