# Supplementary material for: Abundance of Opisthorchis felineus Metacercariae in cyprinid fish in the middle Ob River basin (Tomsk region, Russia)
Source: PubMed Central journal article supplement — Food Waterborne Parasitol. 2021 Feb 5;22:e00113. doi: 10.1016/j.fawpar.2021.e00113 (PMC7930129; doi:10.1016/j.fawpar.2021.e00113), 2021-02-05
Supplement: mmc4.pdf [file mmc4.pdf]

# INDIVIDUAL QUESTIONNAIRE

## GENERAL INFORMATION

ID

Surname \_\_\_ Name \_\_\_ Patronymic \_\_\_ (Initials)

Date of visit

Date of birth

Age

Gender: M F

---

## DISEASE KNOWLEDGE, ATTITUDE AND PERCEPTIONS

**1. Have you ever heard about opisthorchiasis?**

(yes/no/don't know)

**2. How can one become infected with opisthorchiasis?**

2.1 undercooked and raw river fish (yes/no/don't know)

2.2 undercooked and raw fish in general (yes/no/don't know)

2.3 drinking water (yes/no/don't know)

2.4 swimming in water (yes/no/don't know)

2.5 washing items in water (yes/no/don't know)

2.6 because of dirty hands (yes/no/don't know)

2.7 contact with infected person (yes/no/don't know)

2.8 contact with domestic animals (yes/no/don't know)

**3. To what extent can opisthorchiasis be dangerous for your health?**

(not dangerous at all 1-2-3-4-5 Deadly dangerous)

**4. What can be the consequences of opisthorchiasis infection?**

(respiratory problems/skin problems/stomach pain/diarrhea/ weight loss/muscle pain/nausea/cancer/  
other (specify)\_\_\_\_\_)

**5. To what extent is opisthorchiasis wide spread in your setting?**

(very rare 1-2-3-4-5 very wide spread)

**6. To what extent is opisthorchiasis treatable?**

(Not treatable 1-2-3-4-5 Entirely treatable)

**7. What kinds of treatments of opisthorchiasis do you know?**

(specify) \_\_\_\_\_

**8. Is the official medicine for treatment opisthorchiasis effective?**

(Not effective 1-2-3-4-5 Absolutely effective)

**9. Is the official medicine for treatment opisthorchiasis safe?**

(Not safe 1-2-3-4-5 Absolutely safe)

**10. To what extent is it necessary to treat opisthorchiasis when it is diagnosed?**

(Not necessary 1-2-3-4-5 Absolutely necessary)

**11. If you are (again) diagnosed with opisthorchiasis, would you seek any treatment?**

yes/no/not reported)

| If yes                                                                                | If no                                                                                                                                |
|---------------------------------------------------------------------------------------|--------------------------------------------------------------------------------------------------------------------------------------|
| <b>12. Where would you seek treatment?</b><br>(policlinic/hospital/healer/relative or | <b>13. Why you would not seek treatment?</b><br>(inevitable reinfection/opisthorchiasis is untreatable/qualified medical help is not |

|                                               |                                 |
|-----------------------------------------------|---------------------------------|
| friend/internet<br>advice/other(specify)_____ | accessible/other (specify)_____ |
|-----------------------------------------------|---------------------------------|

**14. Are there treatments you would refuse if prescribed?**  
official medicine (biltricide)/natural remedies (phytotherapy) other (specify)\_\_\_\_\_

**15. Open question: Why?**

**16. How can you prevent infection opisthorchiasis infection?**

not eating river fish(yes/no/not reported)

not eating fish at all (yes/no/not reported)

fully cook fish (yes/no/not reported)

use separate cutting boards and knives for fish (yes/no/not reported)

washing hands (yes/no/not reported)

boiling water (yes/no/not reported)

not possible to prevent at all (yes/no/not reported)

other (specify)\_\_\_\_\_

### **FISH STORY**

**17. Did you ever eat river fish?**

(yes/no)

If "NO", go to question 27

If "YES"

**18. What kinds of river fish do you usually eat?**

(specify)

**19. Fishing yourself (yes/no)**

If yes:

**19.1. Where are you usually fishing: specify river or lake**

**19.2. Do you fishing the whole year (both in summer and in winter)? (yes/no)**

**19.3. Do you fishing only in summer? (yes/no)**

**20. How do you consume river fish (choose one or more variants)**

|      |                       |     |    |
|------|-----------------------|-----|----|
| 20.1 | raw / slightly cooked | yes | no |
| 20.2 | slightly salty        | yes | no |
| 20.3 | salty                 | yes | no |
| 20.4 | stockfish             | yes | no |
| 20.5 | frozen                | yes | no |
| 20.6 | smoked                | yes | no |
| 20.7 | fried / boiled        | yes | no |

If "YES"

**21. Do you like to eat raw or undercooked fish?**

(yes/no/not reported)

**22. How often do you eat river fish in any form (only one answer)?**

Every day

most days of the week

2-3 times a week

2-3 times a month

less than 1 time a month

**23. When was the last time you ate fish?**

1-2 days ago  
Last week  
2-3 week ago  
Month ago  
More than month ago

### **MIGRATION**

**24. Since when (which year) do you live here?**

**25. If not since birth, where did you live before?**

other locality of the same Oblast / Okrug  
another Oblast / Okrug specify  
another country specify

### **EDUCATION / OCCUPATION**

**26. What level of education have you completed?**

primary education  
secondary education  
a lower level vocational education diploma  
a higher level vocational education diploma  
a university degree

**27. Are you currently employed (or self-employed)?**  
(yes/no)

**28. What is your current employment activity?**  
Please describe: \_\_\_\_\_

**29. Are there any additional sources of money?**  
Please describe: \_\_\_\_\_

### **OTHER RISK FACTORS**

**30. Do you smoke now?** (yes/no)

If "NO", go to question 42

If "YES":

**31. Duration of smoking** (years)

**32. How many cigarettes do you smoke a day?**

**33. Did you smoke before?**

If "NO", go to question 43, If "YES"

**34. Duration of smoking** (years)

**35. On average how many cigarettes did you smoke per day?**

**36. When did you stop smoking** (years)?

**37. Are you exposed to a passive smoking?** (yes/no)

**38. Do you drink alcoholic beverages?**

(yes/no)

If "NO", go to question 49, If "YES"

**39. Do you use strong alcohol drinks?**

(vodka, whiskey, rum, cognac, brandy, gin, liqueurs)?

(yes/no)

**40. Do you drink low alcohol drinks (wine, beer)?**

(yes/no)

**41. How often do you drink any of these alcohol (only one answer)?**

everyday

most days of the week

2-3 times a week

2-3 times a month

less than 1 time in month

**42. Did you ever drink non-factory alcohol**

("moonshine", alcohol-based technical liquids)?

(yes/no)

If "NO", go to question 49

If "YES"

**43. How often do you drink any of non-factory alcohol  
(only one answer)?**

most days a week

2-3 times a week

2-3 times a month

less than 1 time a month

**44. Did you ever consume narcotics (spices ...)?** (yes/no)

If "no" go to question 54, If "YES"

**45. Which narcotics do you consume specify**

**46. Since when do you consume narcotics (year)?**

**47. When did you stop consume narcotics (year)?**

**48. Do you consume meat of wild animals?**

( yes/no)

**49. What wild animal's meat do you consume?**

**50. Have you ever eaten raw or undercooked meat of wild animals?**

(yes/no)

**51. Are you hunting?**

(yes/no)

**THANK YOU FOR COMPLETING THE QUESTIONNAIRE!**
